# Supplementary material for: Enhanced Cadmium Accumulation and Tolerance in Transgenic Hairy Roots of Solanum nigrum L. Expressing Iron-Regulated Transporter Gene IRT1
Source: MDPI journal article supplement (doi:10.3390/life10120324), 2020-12-03
Supplement: s1 [file s1]

# Supplementary Material of Enhanced Cadmium Accumulation and Tolerance in Transgenic Hairy Roots of *Solanum Nigrum* L. Expressing Iron-Regulated Transporter Gene *IRT1*

Table S1. Primers' sequences of PCR

| Primers        | Sequences                       |
|----------------|---------------------------------|
| Forward primer | ATG GCT TCA AAT TCA GCA CTT CTC |
| Reverse primer | TTA AGC CCA TTT GGC GAT AAT CG  |

Table S2. PCR cycling conditions

| Operation steps   | Conditions                                                                     |
|-------------------|--------------------------------------------------------------------------------|
| Denaturation step | 94 °C, 10 min                                                                  |
| Cycles            | 35 cycles: 94 °C, 1 min; annealing, 56 °C, 1 min, and elongating, 72 °C, 1 min |
| Elongation        | 72 °C, 10 min                                                                  |

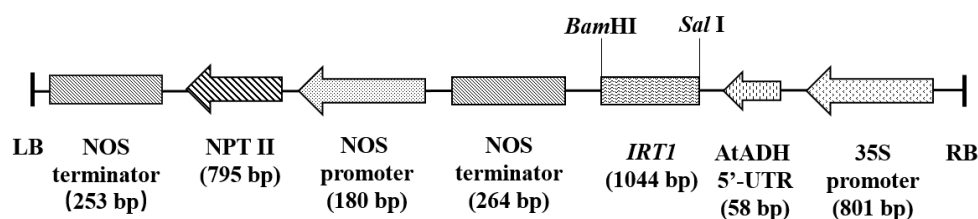

Figure S1. Schematic representation of the T-DNA region of the recombinant plasmid pRI101-*IRT1* based on plasmid pRI101-AN.

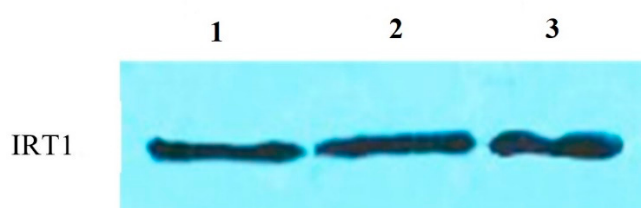

Figure S2. Western blot test of transgenic hairy roots of *Solanum nigrum* L. Lane 1-3: the *IRT1* protein observed in the transgenic hairy roots of *Solanum nigrum* L.

**Publisher's Note:** MDPI stays neutral with regard to jurisdictional claims in published maps and institutional affiliations.

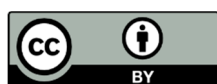

© 2020 by the authors. Submitted for possible open access publication under the terms and conditions of the Creative Commons Attribution (CC BY) license (<http://creativecommons.org/licenses/by/4.0/>).
